# Supplementary material
Source: publisher figshare collection journal article supplement (https://asha.figshare.com/ndownloader/files/32878184)
Supplement: Supplementary file 1 [file 32878184]

**Supplemental Material S1.** Analysis including maternal education.

We ran an additional analysis including mother's education. To do so, we created a dummy variable to examine the difference between children whose mother had education levels up to high school and those children whose mothers had some college and above (Reference group is up to high school). These results are presented for general information, and we caution the reader on the interpretation of these results. Maternal education and home language are confounded in this sample as there are no mothers with up to high school who speak English only. Therefore, we cannot separate the effect of maternal education and home language.

| English Vocabulary               |          |     |          |     |          |     |          |      |          |      |          |     |          |      |
|----------------------------------|----------|-----|----------|-----|----------|-----|----------|------|----------|------|----------|-----|----------|------|
| (PPVT raw score)                 | Model 1  |     | Model 2  |     | Model 3  |     | Model 4  |      | Model 5  |      | Model 6  |     | Model 7  |      |
| Fixed Effects                    | Est.     | SE  | Est.     | SE  | Est.     | SE  | Est.     | SE   | Est.     | SE   | Est.     | SE  | Est.     | SE   |
| Intercept                        | 82.7*    | 3.8 | 42.5*    | 4.3 | 24.6*    | 5.6 | 32.7*    | 5.5  | 26.8*    | 6.1  | 30.7*    | 6.0 | 33.4*    | 6.4  |
| Age in months                    |          |     | 1.4*     | 0.1 | 1.4*     | 0.1 | 1.4*     | 0.1  | 1.4*     | 0.1  | 1.4*     | 0.1 | 1.3*     | 0.1  |
| Delivery                         |          |     |          |     | 8.2      | 5.6 |          |      | 11.7     | 5.4  | 8.0      | 5.3 | 11.4     | 5.1  |
| Mother’s education               |          |     |          |     | 29.6     | 5.5 | 22.9*    | 5.6  | 24.3*    | 5.4  | 26.8*    | 5.4 | 21.6*    | 5.3  |
| Home Language:                   |          |     |          |     |          |     | 24.0     | 10.4 | 28.1*    | 10.4 |          |     | 26.5*    | 9.9  |
| Both vs. English Only            |          |     |          |     |          |     |          |      |          |      |          |     |          |      |
| Both vs. Spanish Only            |          |     |          |     |          |     | -5.9     | 5.6  | -6.3     | 5.4  |          |     | -6.9     | 5.2  |
| English only vs.<br>Spanish only |          |     |          |     |          |     | -29.9*   | 10.4 | -34.4*   | 10.4 |          |     | -33.3*   | 10.0 |
| DLD                              |          |     |          |     |          |     |          |      |          |      | -8.8     | 3.7 | -8.9     | 3.7  |
| Random Effects                   | Variance |     | Variance |     | Variance |     | Variance |      | Variance |      | Variance |     | Variance |      |
| Random Intercept<br>(Child)      | 1135.20  |     | 853.20   |     | 561.10   |     | 524.90   |      | 500.10   |      | 508.10   |     | 448.50   |      |
| Residual                         | 332.20   |     | 119.30   |     | 121.10   |     | 121.20   |      | 121.00   |      | 125.20   |     | 125.30   |      |
| Intra-Class Correlation          | 0.77     |     | 0.88     |     |          |     |          |      |          |      |          |     |          |      |

**Note.** \* $p < .01$ . For models which include home language as a predictor, the reported intercept estimate represents the predicted value for a subject in the group *Both*, which was used as the reference group. The estimate of the difference between the *English Only* and *Spanish Only* groups was obtained by re-coding home language using *English Only* as the reference group and re-estimating the models. All estimates aside from the intercept are not affected by re-coding the reference group. Number of subjects for Models 1 and 2 were 89. Number of subjects for Models 3 to 7 was 85.

**Spanish Vocabulary**

| (TVIP raw score)                 | Model 1  |     | Model 2  |     | Model 3  |     | Model 4  |     | Model 5  |     | Model 6  |     | Model 7  |     |
|----------------------------------|----------|-----|----------|-----|----------|-----|----------|-----|----------|-----|----------|-----|----------|-----|
| <i>Fixed Effects</i>             | Est.     | SE  |
| Intercept                        | 38.3*    | 1.9 | 16.9*    | 2.7 | 14.3*    | 3.5 | 11.3*    | 3.5 | 11.6*    | 3.8 | 21.6*    | 3.9 | 19.5*    | 4.1 |
| Age in months                    |          |     | 0.7*     | 0.1 | 0.7*     | 0.1 | 0.7*     | 0.1 | 0.7*     | 0.1 | 0.7*     | 0.1 | 0.6*     | 0.1 |
| Delivery                         |          |     |          |     | 0.5      | 3.3 |          |     | -0.6     | 3.3 | 0.3      | 3.0 | -0.9     | 3.0 |
| Mother’s education               |          |     |          |     | 4.6      | 3.2 | 6.6      | 3.3 | 6.5      | 3.3 | 1.5      | 3.1 | 3.4      | 3.1 |
| Home Language:                   |          |     |          |     |          |     |          |     |          |     |          |     |          |     |
| Both vs. English Only            |          |     |          |     |          |     | -5.3     | 6.1 | -5.6     | 6.3 |          |     | -7.2     | 5.7 |
| Both vs. Spanish Only            |          |     |          |     |          |     | 5.7      | 3.3 | 5.7      | 3.3 |          |     | 5.1      | 3.0 |
| English only vs.<br>Spanish only |          |     |          |     |          |     | 11.0     | 6.1 | 11.2     | 6.3 |          |     | 12.3     | 5.7 |
| DLD                              |          |     |          |     |          |     |          |     |          |     | -9.9*    | 2.9 | -10.3*   | 2.8 |
| <i>Random Effects</i>            | Variance |     |
| Random Intercept                 |          |     |          |     |          |     |          |     |          |     |          |     |          |     |
| (Child)                          | 240.2    |     | 162.3    |     | 161.6    |     | 152.2    |     | 154.5    |     | 124.9    |     | 115.5    |     |
| Residual                         | 151.6    |     | 95.6     |     | 99.9     |     | 99.8     |     | 99.8     |     | 105.5    |     | 105.9    |     |
| Intra-Class Correlation          | 0.61     |     | 0.63     |     |          |     |          |     |          |     |          |     |          |     |

**Note.** \* $p < .01$ . For models which include home language as a predictor, the reported intercept estimate represents the predicted value for a subject in the group *Both*, which was used as the reference group. The estimate of the difference between the *English Only* and *Spanish Only* groups was obtained by re-coding home language using *English Only* as the reference group and re-estimating the models. All estimates aside from the intercept are not affected by re-coding the reference group. Number of subjects for Models 1 and 2 were 89. Number of subjects for Models 3 to 7 was 85.
